# Supplementary material
Source: MDPI journal article supplement (https://www.mdpi.com/search?q=molecules-24-03718)
Supplement: s001 [file molecules-24-03718-s001.pdf]

# Supporting Information

---

## Metal-organic Frameworks of MIL-100(Fe, Cr) and MIL-101(Cr) for Aromatic Amines Adsorption from Aqueous Solutions

Mao-Long Chen\*, Shu-Yang Zhou, Zhou Xu, Li Ding and Yun-Hui Cheng\*

College of Chemistry and Food Engineering, Changsha University of Science &

Technology, Changsha, 410114, China E-mail: mlchen@xmu.edu.cn(ML Chen),

chengyh6488@gmail.com(YH Cheng).

|                                                                                                                                                                                                    |    |
|----------------------------------------------------------------------------------------------------------------------------------------------------------------------------------------------------|----|
| Synthesis and activation of MIL-100(Cr) .....                                                                                                                                                      | 1  |
| Synthesis and activation of MIL-101(Cr) .....                                                                                                                                                      | 1  |
| <b>Figure S1.</b> FT-IR spectra of the three samples. ....                                                                                                                                         | 2  |
| <b>Figure S2.</b> TG-DTG curves of (a)MIL-100(Cr) (b) MIL-101(Cr) and (c)MIL-100(Fe).....                                                                                                          | 4  |
| <b>Figure S3.</b> The pore size distribution of MIL-100(Fe) (blue), MIL-100(Cr) (black) and<br>MIL-101(Cr) (red).....                                                                              | 4  |
| <b>Figure S4.</b> The calibration curves of (a)aniline (b)1-naphthylamine (c)o-toluidine<br>(d)2-nitroaniline (e)2-amino-4-nitrotoluene .....                                                      | 7  |
| <b>Figure S5.</b> (a)(b) The pseudo first-order kinetic model of MIL-100(Fe) and MIL-101(Cr).(c)<br>Isothermal Freundlich model of MIL-100(Fe)(d)Isothermal Langmuir model of<br>MIL-101(Cr). .... | 8  |
| <b>Table.S1.</b> Thermal analysis data of MIL-100(Fe,Cr), MIL-101(Cr). ....                                                                                                                        | 9  |
| <b>Table S2.</b> surface area, pore volume, pore size of the,MIL-100(Fe,Cr),MIL-101(Cr). ....                                                                                                      | 9  |
| <b>Table.S3.</b> the measurements for each combination of MOF and aniline<br>derivative.(mg/g) .....                                                                                               | 10 |

# Supporting Information

---

## Synthesis and activation of MIL-100(Cr)

3.6 g  $\text{Cr}(\text{NO}_3)_3 \cdot 9\text{H}_2\text{O}$ , 1.35 g 1,3,5-benzenetricarboxylic acid, 60 mL of  $\text{H}_2\text{O}$  were added to teflon-lined steel autoclaves and maintained at  $220^\circ\text{C}$  for 96 h. After cooling, the sample was washed with water and activated by thermal treatment at  $150^\circ\text{C}$  [S1].

## Synthesis and activation of MIL-101(Cr)

Terephthalic acid (1.64 g),  $\text{Cr}(\text{NO}_3)_3 \cdot 9\text{H}_2\text{O}$  (4 g) and  $\text{H}_2\text{O}$  (60 mL) were added to teflon-lined steel autoclaves and maintained at  $220^\circ\text{C}$  for 8 h [S2]. After cooling, the as-synthesized MIL-101 was further purified by hot ethanol,  $\text{H}_2\text{O}$  and acetone solutions. After drying at  $80^\circ\text{C}$ , MIL-101 was vacuum dried at  $150^\circ\text{C}$  overnight.

[S1] Gérard, F.; Christian, S.; Caroline, M.D.; Franck, M.; Suzy, S.; Julien, D.; Irène, M. A hybrid solid with giant pores prepared by a combination of targeted chemistry, simulation, and powder diffraction[J]. *Angewandte Chemie Int Ed*, 2010, 116: 6456-6461.

[S2] Hwang, Y.K.; Hong, D.Y.; Chang, J.S.; Jung, S.H.; Seo, Y.K.; Kim, J.; Vimont, A.; Daturi, M.; Serre, C.; Férey, G. Titelbild: Amine Grafting on Coordinatively Unsaturated Metal Centers of MOFs: Consequences for Catalysis and Metal Encapsulation [J]. *Angewandte Chemie Int Ed*, 2010, 47: 4144-4148.

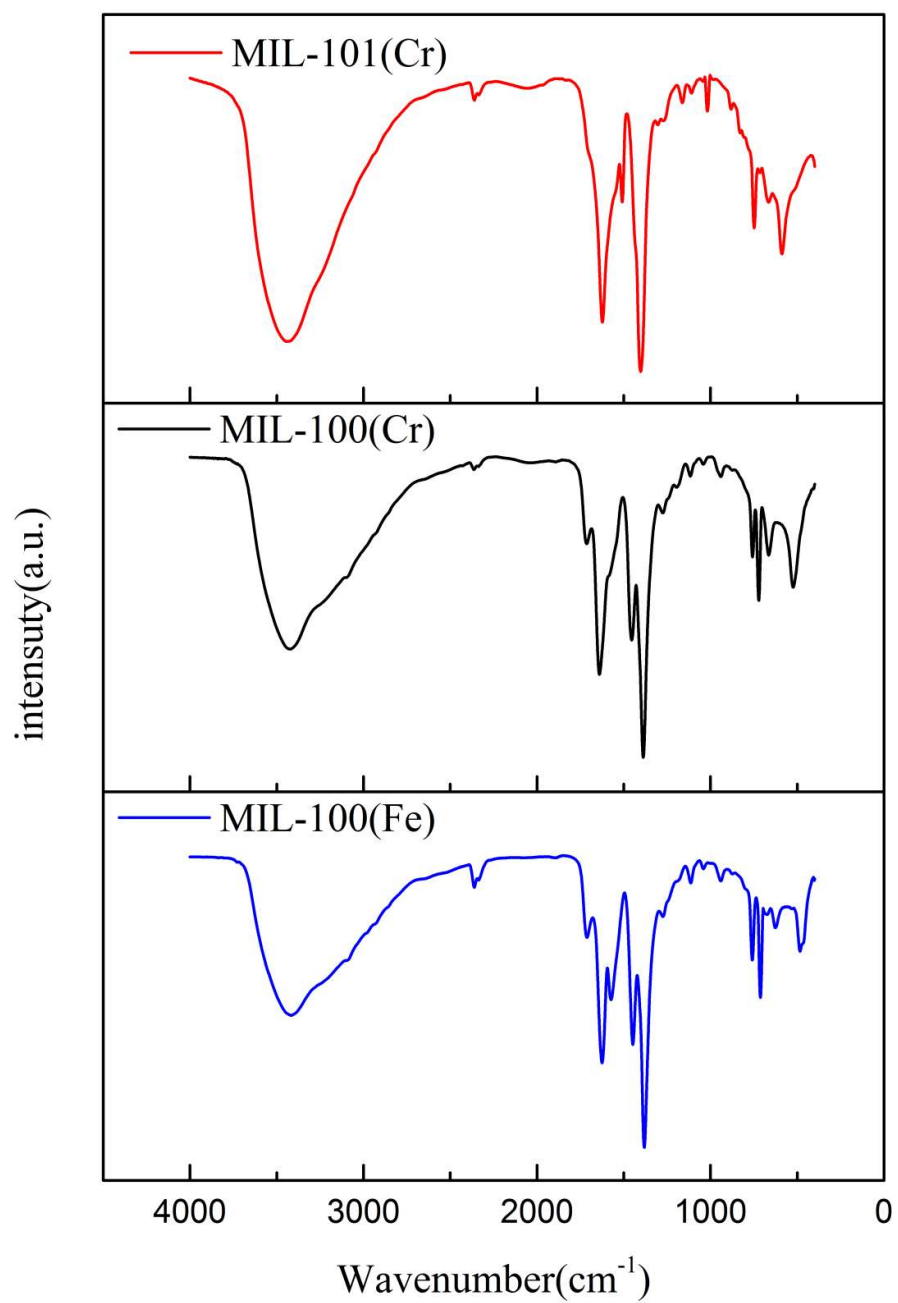

Figure S1. FT-IR spectra of the three samples.

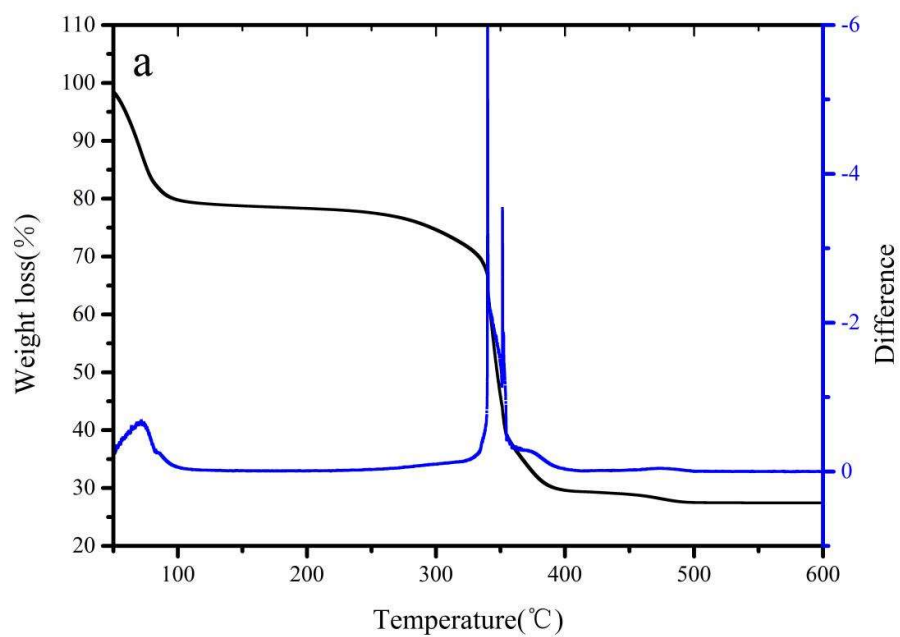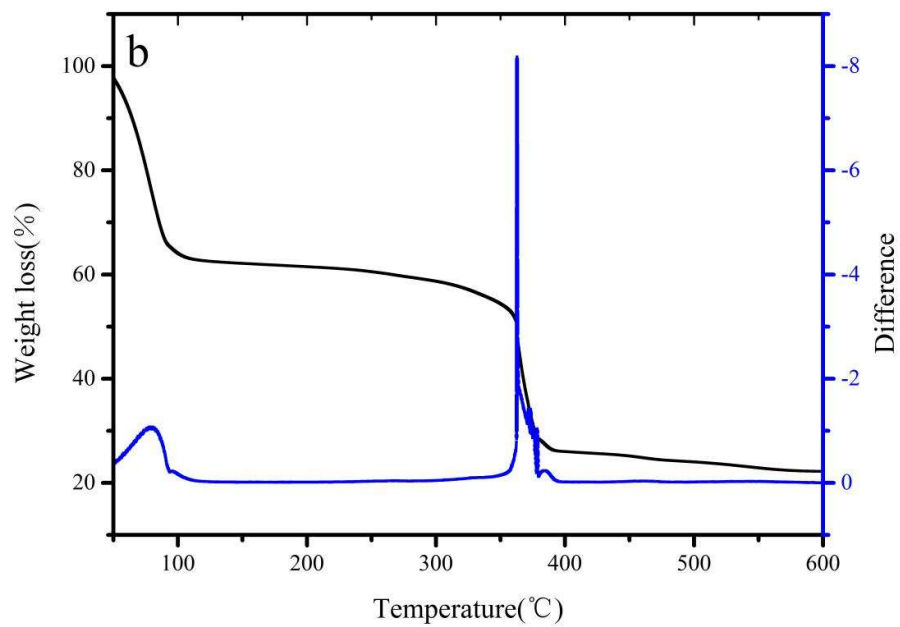

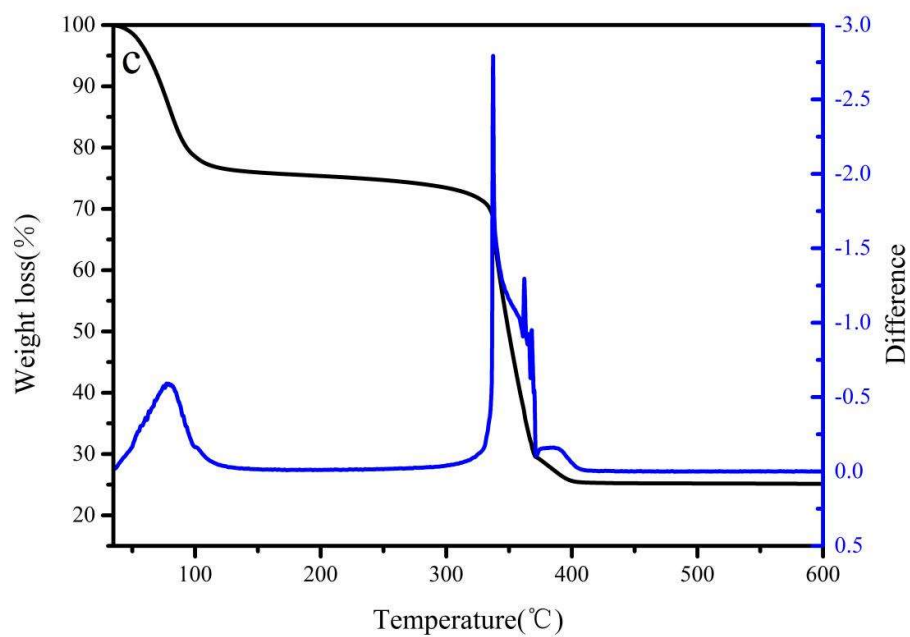

**Figure S2.** TG-DTG curves of (a)MIL-100(Cr) (b) MIL-101(Cr) and (c)MIL-100(Fe)

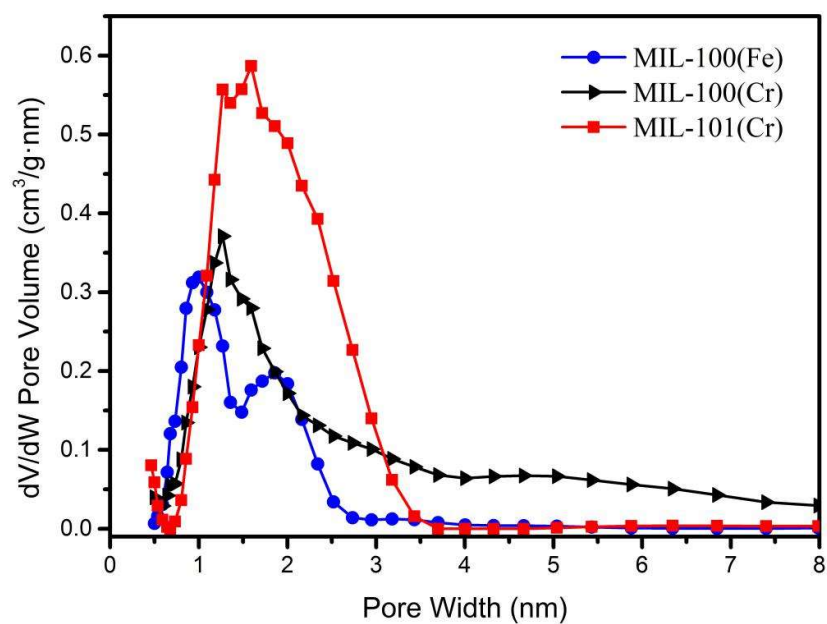

**Figure S3.** The pore size distribution of MIL-100(Fe) (blue), MIL-100(Cr) (black) and MIL-101(Cr) (red).

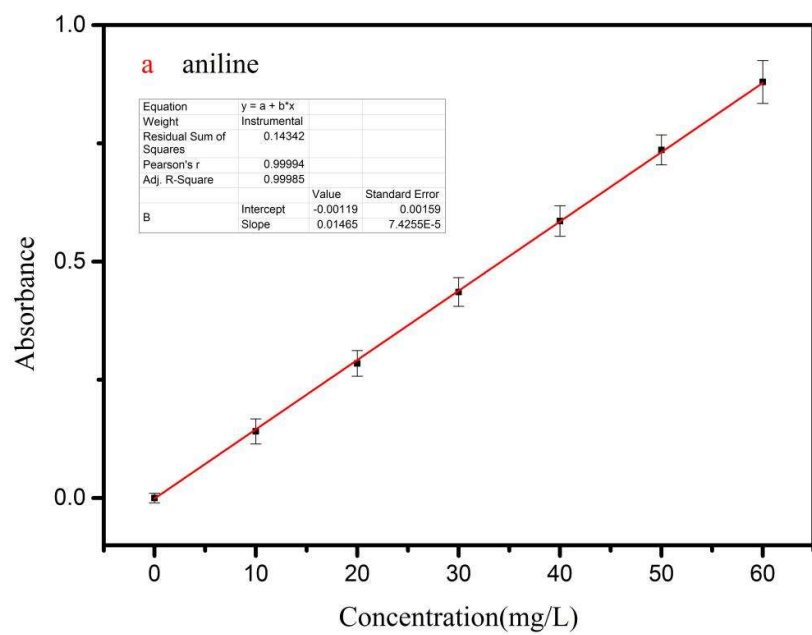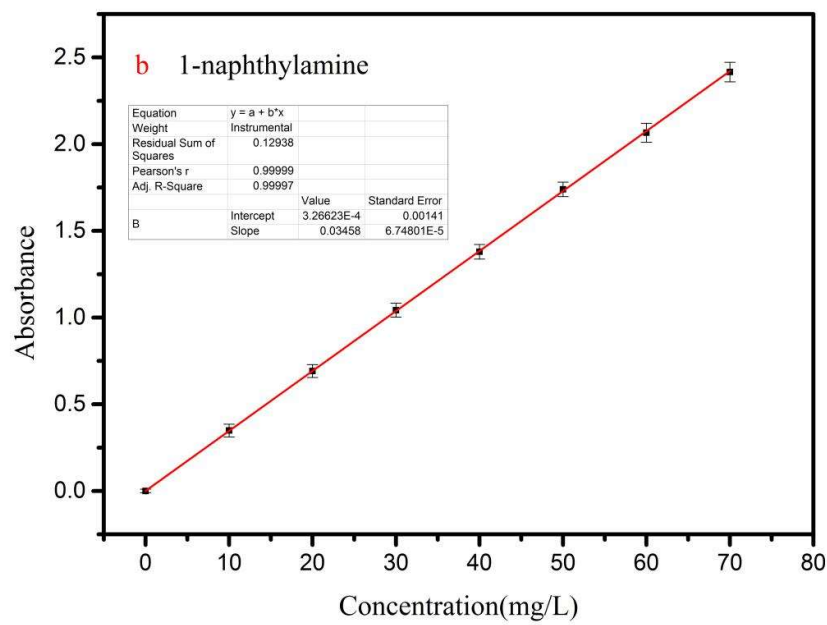

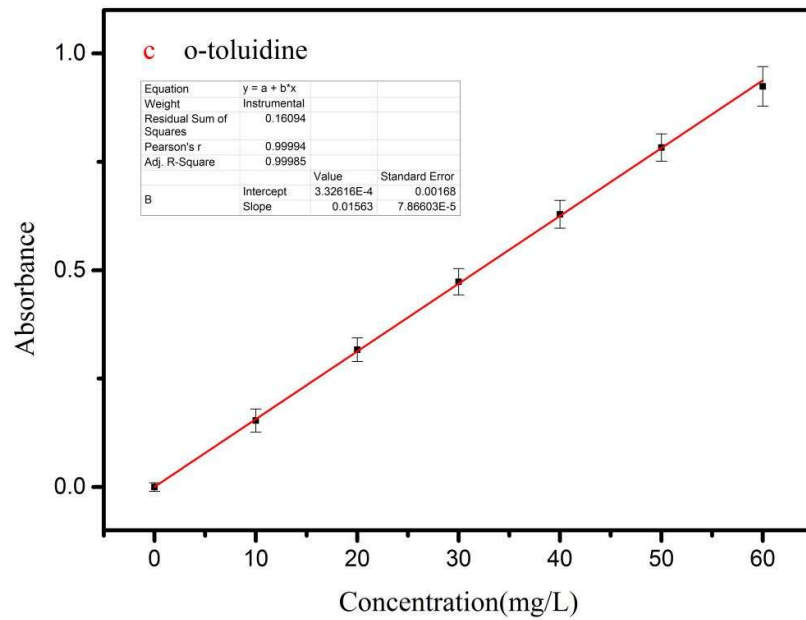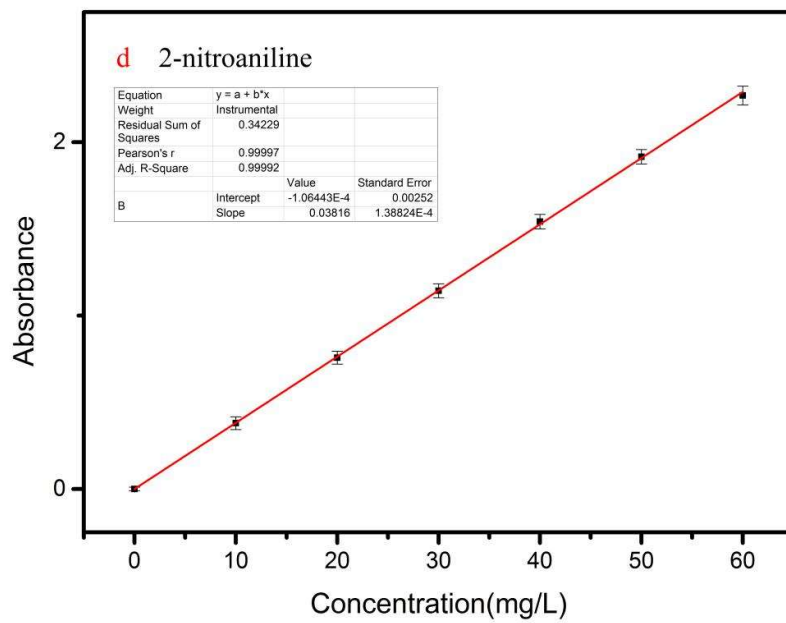

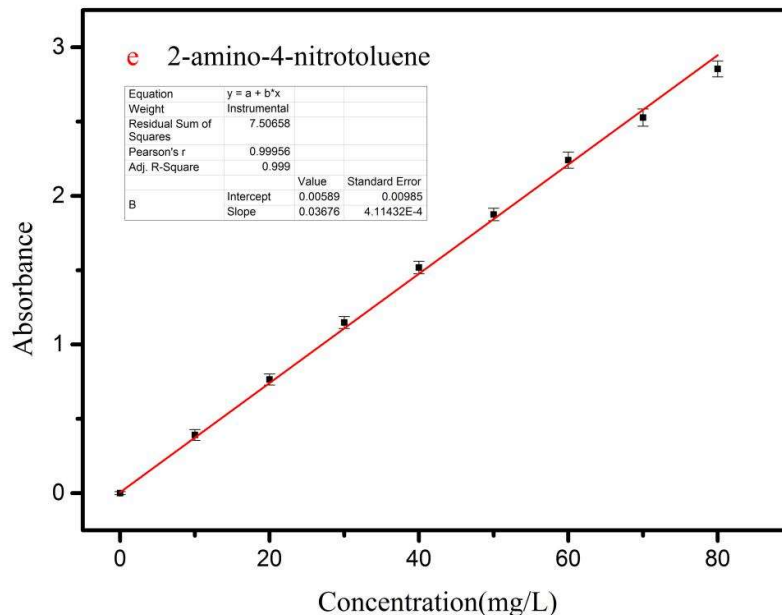

**Figure S4.** The calibration curves of (a)aniline (b)1-naphthylamine (c)o-toluidine (d)2-nitroaniline (e)2-amino-4-nitrotoluene

Aqueous stock solutions of Aromatic amine (100mg/L) were prepared by dissolving Aromatic amine in Milli-Q water. Aqueous solutions with different concentrations(10-80mg/L) of Aromatic amine were prepared by serial dilution of the stock solution with Milli-Q water. The Absorbance of aromatic amine solution were determined using UV-vis spectrophotometer (Shimadzu UV-2550) at 280 nm. Standard curve is established by known concentrations of aromatic amines and absorbance.



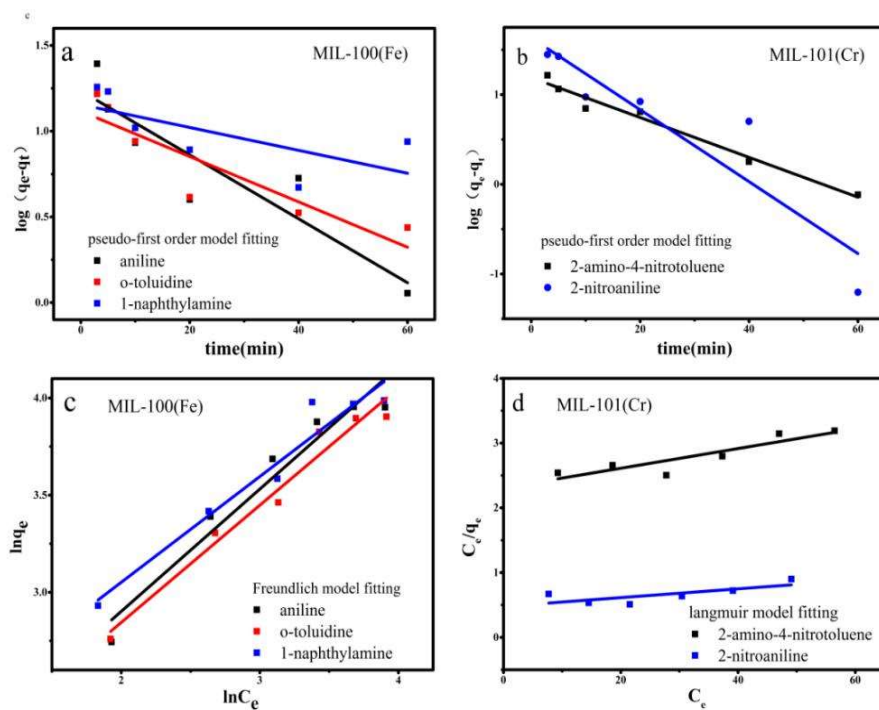

**Figure S5.** (a)(b) The pseudo first-order kinetic model of MIL-100(Fe) and MIL-101(Cr).(c) Isothermal Freundlich model of MIL-100(Fe)(d)Isothermal Langmuir model of MIL-101(Cr).

**Table S1.** Thermal analysis data of MIL-100(Fe,Cr), MIL-101(Cr).

| Entry       | Loss1, water molecules | Loss 2, organic ligands | Calculated residues                    |
|-------------|------------------------|-------------------------|----------------------------------------|
| MIL-100(Cr) | 76 °C, 79.3%           | 341 °C, 27.6%           | Cr <sub>2</sub> O <sub>3</sub> , 27.5% |
| MIL-101(Cr) | 81 °C, 62.5%           | 362 °C, 22.6%           | Cr <sub>2</sub> O <sub>3</sub> , 20.9% |
| MIL-100(Fe) | 84 °C, 75%;            | 345 °C, 25.2%           | Fe <sub>2</sub> O <sub>3</sub> , 28.5% |

**Table S2.** surface area, pore volume, pore size of the, MIL-100(Fe,Cr), MIL-101(Cr).

| Samples     | BET surface area (m <sup>2</sup><br>g <sup>-1</sup> ) | Pore volume (cm <sup>3</sup><br>g <sup>-1</sup> ) | Pore width<br>(nm) |
|-------------|-------------------------------------------------------|---------------------------------------------------|--------------------|
| MIL-100(Fe) | 1018                                                  | 0.67                                              | 1.14               |
| MIL-100(Cr) | 1427                                                  | 1.39                                              | 1.26               |
| MIL-101(Cr) | 2134                                                  | 1.15                                              | 1.61               |

**Table.S3.**the measurements for each combination of MOF and aniline derivative.(mg/g)

| MOFs        | Initial concentration(mg/L) | Capacity of aromatic amines by MOFs(mg/g) |       |                 |       |       |             |       |       |                |       |       |                        |       |       |       |
|-------------|-----------------------------|-------------------------------------------|-------|-----------------|-------|-------|-------------|-------|-------|----------------|-------|-------|------------------------|-------|-------|-------|
|             |                             | aniline                                   |       | 1-naphthylamine |       |       | o-toluidine |       |       | 2-nitroaniline |       |       | 2-amino-4-nitrotoluene |       |       |       |
| MIL-100(Fe) | 10                          | 13.68                                     | 15.55 | 17.14           | 18.75 | 19.24 | 17.63       | 15.80 | 14.46 | 17.11          | 0     | 0.21  | 0                      | 1.45  | 2.14  | 0.62  |
|             | 20                          | 27.25                                     | 29.65 | 31.87           | 30.50 | 31.97 | 28.89       | 27.25 | 28.30 | 30.45          | 0.50  | 0.21  | 0.46                   | 1.62  | 0.78  | 2.68  |
|             | 30                          | 37.27                                     | 39.90 | 41.07           | 36.05 | 37.26 | 35.08       | 35.25 | 34.15 | 38.35          | 0.50  | 0.43  | 0.14                   | 1.76  | 2.77  | 0.98  |
|             | 40                          | 46.43                                     | 48.30 | 50.98           | 53.45 | 53.97 | 49.01       | 45.85 | 45.90 | 37.15          | 3.80  | 3.12  | 3.91                   | 1.91  | 2.39  | 0.41  |
|             | 50                          | 49.52                                     | 52.15 | 54.59           | 52.95 | 56.93 | 48.96       | 49.20 | 50.05 | 42.60          | 3.00  | 3.33  | 2.85                   | 2.48  | 1.29  | 2.51  |
|             | 60                          | 46.06                                     | 52.05 | 53.97           | 53.90 | 56.75 | 48.71       | 49.60 | 47.40 | 54.45          | 3.70  | 3.31  | 3.60                   | 2.67  | 3.37  | 2.08  |
|             | 70                          |                                           |       |                 | 53.20 | 55.94 | 50.07       |       |       |                |       |       |                        | 3.02  | 3.54  | 2.44  |
|             | 80                          |                                           |       |                 |       |       |             |       |       |                |       |       |                        | 2.87  | 3.36  | 2.02  |
| MIL-100(Cr) | 10                          | 8.80                                      | 10.54 | 5.58            | 12.75 | 14.55 | 12.20       | 0     | 0.14  | 0              | 0.52  | 0     | 0.58                   | 3.65  | 2.52  | 4.47  |
|             | 20                          | 13.40                                     | 14.86 | 9.95            | 20.35 | 19.50 | 16.65       | 2.00  | 2.55  | 1.45           | 1.00  | 1.34  | 0.83                   | 4.40  | 5.51  | 3.34  |
|             | 30                          | 15.40                                     | 12.17 | 15.83           | 27.25 | 29.30 | 24.50       | 7.80  | 5.55  | 10.15          | 3.35  | 4.21  | 3.22                   | 5.35  | 6.53  | 4.19  |
|             | 40                          | 20.05                                     | 22.40 | 16.79           | 25.85 | 29.87 | 22.18       | 10.20 | 6.50  | 13.5           | 1.45  | 1.96  | 1.38                   | 7.65  | 6.24  | 8.86  |
|             | 50                          | 22.75                                     | 25.70 | 18.05           | 25.00 | 32.18 | 20.02       | 13.75 | 8.71  | 17.46          | 7.45  | 5.23  | 7.88                   | 7.00  | 5.37  | 8.77  |
|             | 60                          | 23.80                                     | 27.93 | 18.76           | 24.50 | 30.36 | 21.08       | 13.05 | 14.5  | 8.15           | 9.30  | 9.68  | 7.61                   | 7.30  | 7.79  | 5.37  |
|             | 70                          |                                           |       |                 | 25.50 | 31.20 | 22.28       |       |       |                |       |       |                        | 9.75  | 8.56  | 11.08 |
|             | 80                          |                                           |       |                 |       |       |             |       |       |                |       |       |                        | 7.30  | 7.28  | 9.61  |
| MIL-101(Cr) | 10                          | 6.70                                      | 7.61  | 5.76            | 12.95 | 13.98 | 11.45       | 5.95  | 4.73  | 7.97           | 11.50 | 11.30 | 12.10                  | 3.65  | 4.27  | 2.73  |
|             | 20                          | 14.00                                     | 15.24 | 10.75           | 25.75 | 26.94 | 24.40       | 21.45 | 21.90 | 14.15          | 27.30 | 28.20 | 26.25                  | 7.00  | 6.74  | 7.63  |
|             | 30                          | 14.15                                     | 10.07 | 17.91           | 34.50 | 31.50 | 34.50       | 36.4  | 35.15 | 39.30          | 42.25 | 41.80 | 44.85                  | 11.1  | 10.31 | 11.75 |
|             | 40                          | 16.95                                     | 20.82 | 12.68           | 37.20 | 34.85 | 36.50       | 44.05 | 39.65 | 48.91          | 47.85 | 46.80 | 51.20                  | 13.35 | 15.66 | 12.35 |
|             | 50                          | 19.65                                     | 21.77 | 17.19           | 37.20 | 42.75 | 33.26       | 44.10 | 42.45 | 49.80          | 54.30 | 54.20 | 59.60                  | 14.95 | 13.97 | 15.96 |
|             | 60                          | 19.30                                     | 21.88 | 17.37           | 37.35 | 39.74 | 30.90       | 43.60 | 41.10 | 49.30          | 54.55 | 53.15 | 60.25                  | 17.7  | 19.23 | 16.37 |

---

|    |       |      |       |       |       |       |
|----|-------|------|-------|-------|-------|-------|
| 70 | 38.85 | 43.9 | 35.65 | 25.55 | 26.65 | 23.97 |
| 80 |       |      |       | 25.1  | 26.78 | 23.84 |

---
